# Supplementary material for: PPARα alleviates iron overload‐induced ferroptosis in mouse liver
Source: PubMed Central journal article supplement — EMBO Rep. 2022 Jun 15;23(8):e52280. doi: 10.15252/embr.202052280 (PMC9346473; doi:10.15252/embr.202052280), 2022-06-15
Supplement: EMBR-23-e52280-s001.pdf [file EMBR-23-e52280-s001.pdf]

## **Table of Contents**

|                                     |          |
|-------------------------------------|----------|
| <b>Appendix table S1 .....</b>      | <b>2</b> |
| <b>Appendix figure S1 .....</b>     | <b>3</b> |
| <b>Appendix figure legend .....</b> | <b>3</b> |

## Appendix table S1:

qRT-PCR primer sequence information:

| Primer | Sense 5'-3'              | Antisense 5'-3'          |
|--------|--------------------------|--------------------------|
| GPX4   | CTCCATGCACGAATTCTCAG     | ACGTCAGTTTTGCCTCATTG     |
| PTGS2  | CTGCGCCTTTTCAAGGATGG     | GGGATACACCTCTCCACCA      |
| ACOX1  | CCTGATTCAGCAAGGTAGGG     | TCGCAGACCCTGAAGAAATC     |
| 36B4   | TGGAGACAAGGTGGGAGCC      | CACAGACAATGCCAGGACGC     |
| FPN1   | TCGGTTCCTCTCACTCCTGT     | GTGGAGAGAGAGTGGCCAAG     |
| HEPC1  | CCTATCTCCATCAACAGATG     | AACAGATACCACACTGGGAA     |
| DMT1   | TAGGCTGTGCTCAAACCTACAGCA | TACATGAGAGCCAGGCATGGTAGA |
| TRF    | TGTAGCCTTTGTGAAACACCAGA  | TCGGCAGGGTTCTTTCCTT      |
| MDM2   | GGATCTTGACGATGGCGTAAG    | AGGCTGTAATCTTCCGAGTCC    |
| MDMX   | GATCCAAGCCCTCTCTATGACA   | CCGTGCTTCAGTCGGTCTT      |
| CPT1   | AGATCAATCGGACCCTAGACAC   | CAGCGAGTAGCGCATAGTCA     |

## Appendix figure S1

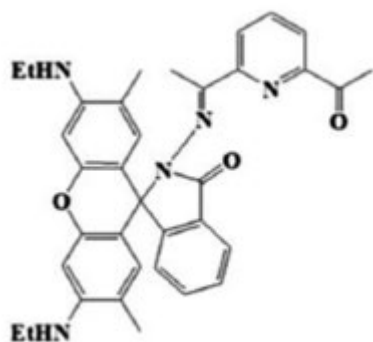

## Appendix Figure legend

Appendix Figure S1. Structure of the Fe<sup>2+</sup> fluorescent probe.
