# Supplementary material for: PPARα alleviates iron overload‐induced ferroptosis in mouse liver
Source: PubMed Central journal article supplement — EMBO Rep. 2022 Jun 15;23(8):e52280. doi: 10.15252/embr.202052280 (PMC9346473; doi:10.15252/embr.202052280), 2022-06-15
Supplement: EMBR-23-e52280-s003.pdf [file EMBR-23-e52280-s003.pdf]

## Expanded View Figures

**Figure EV1. Activation of PPAR $\alpha$  suppresses iron overload-induced Ferroptosis *in vivo*.**

- A Serum ALT and AST levels was measured in 8-week-old WT mice that were received intraperitoneal injections of dextransulfate with or without GW7647 treatment.
- B Liver sections were obtained from the indicated mice and stained with H&E. All scale bars are 50  $\mu$ m.
- C Liver sections were obtained from the indicated mice and stained with TUNEL. All scale bars are 20  $\mu$ m.
- D Hepatic and serum HMGB1 content were measured in the indicated mice.
- E Hepatic Gpx4 mRNA levels were measured in the indicated mice.
- F Hepatic MDA content was measured in 8-week-old WT mice that were received intraperitoneal injections of dextransulfate with or without GW7647 treatment.
- G Hepatic iron content was measured in 8-week-old WT mice that were received intraperitoneal injections of dextransulfate with or without GW7647 treatment.

Data information: In (A–G),  $n = 3$ –5 mice/group. mRNA levels were normalized to 36B4 and are expressed relative to the mean value of the WT group; Data are presented as means  $\pm$  SD. \* $P < 0.05$ , \*\* $P < 0.01$ , determined by ANOVA.

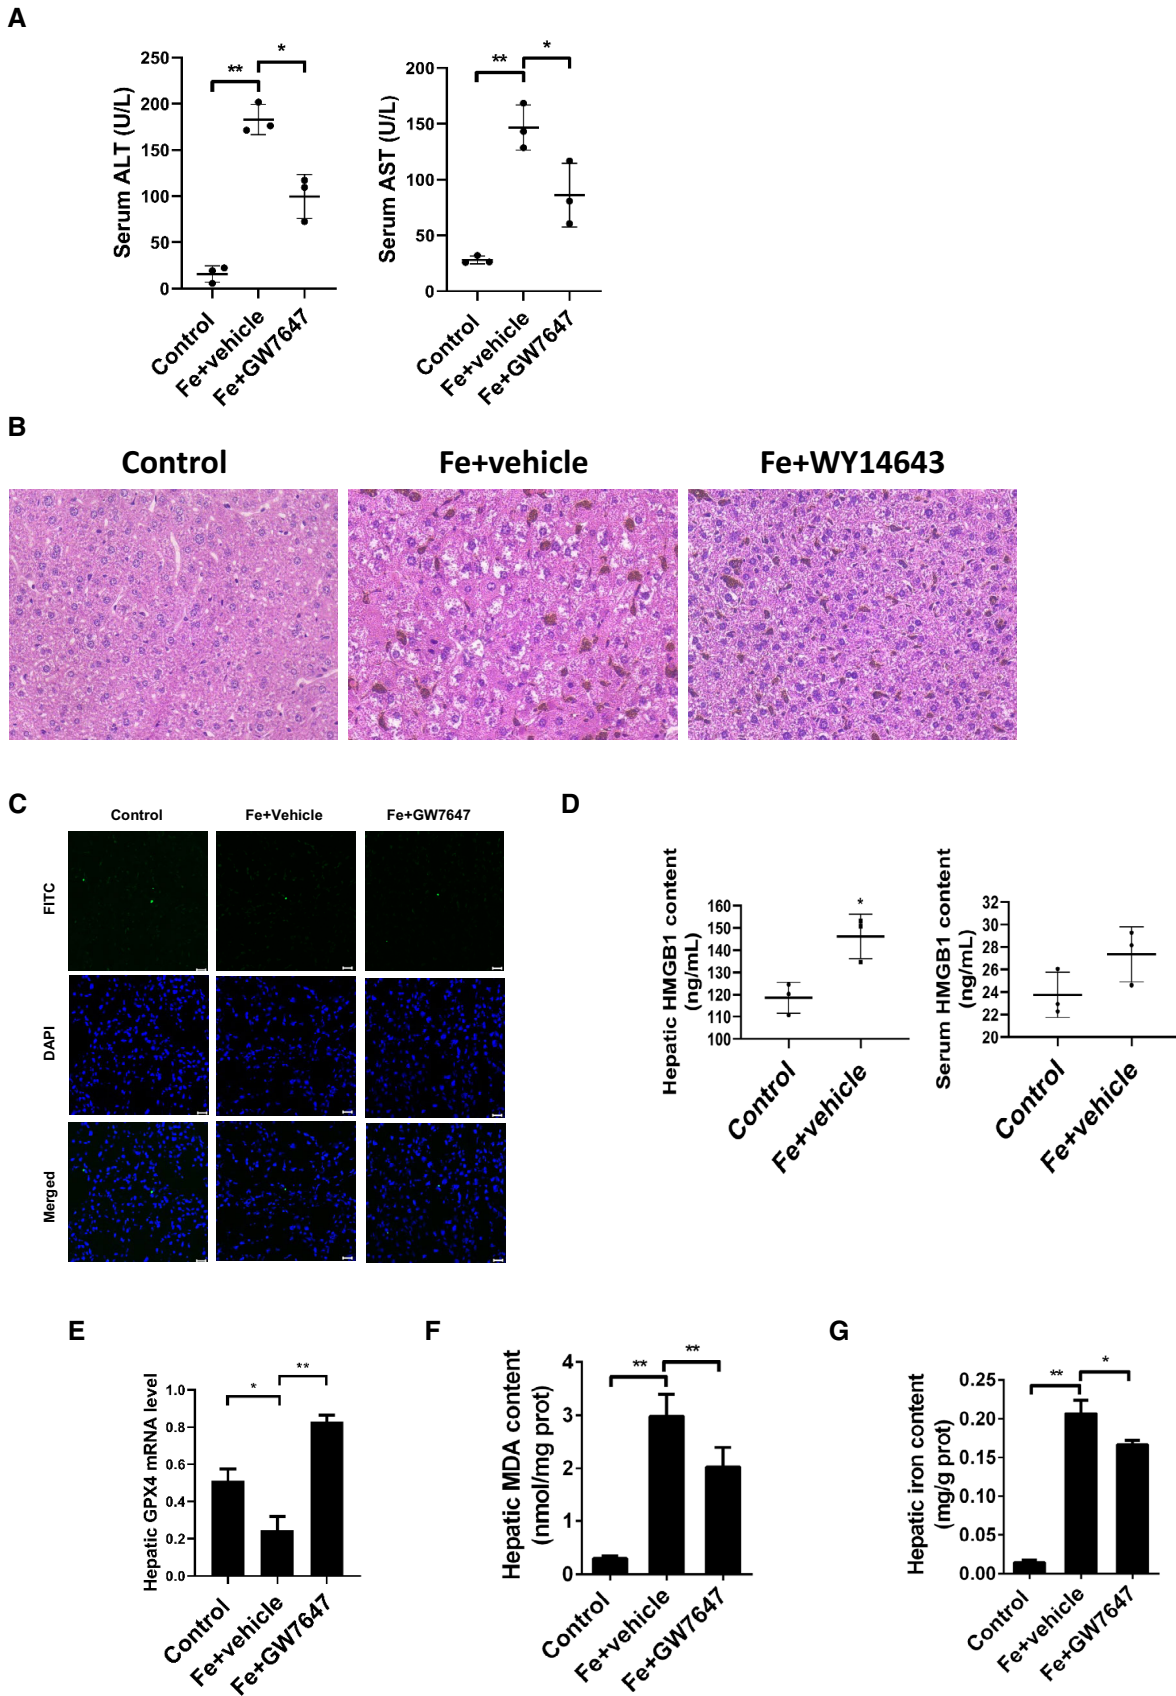

Figure EV1.

**Figure EV2. Activated PPAR $\alpha$  inhibited Ferroptosis caused by iron overload.**

- A Hepatic FSP1 mRNA levels were measured in the indicated mice.
- B Hepatic MDM2 and MDMX mRNA levels were measured in the indicated mice.
- C MDM2, MDMX, CPT1 and GPX4 mRNA levels were measured in the Hep1-6 cells after MDM2 or MDMX knockdown.
- D Hepatic NRF2 mRNA levels, hepatic HO1 mRNA levels, and hepatic NQO1 mRNA levels were measured in the indicated mice.
- E Liver sections were obtained from the indicated mice and stained with Prussian blue All scale bars are 50  $\mu$ m.
- F Hepatic iron content was measured in 8-week-old WT, PPAR $\alpha$ <sup>-/-</sup> mice that were fed a HID or received intraperitoneal injections of dextransulfate sodium;  $n = 3-5$  mice/group.

Data information: In (A, B, D-E),  $n = 3-5$  mice/group. mRNA levels were normalized to 36B4 and are expressed relative to the mean value of the WT group; Data are presented as means  $\pm$  SD. \* $P < 0.05$ , \*\* $P < 0.01$ , determined by ANOVA.

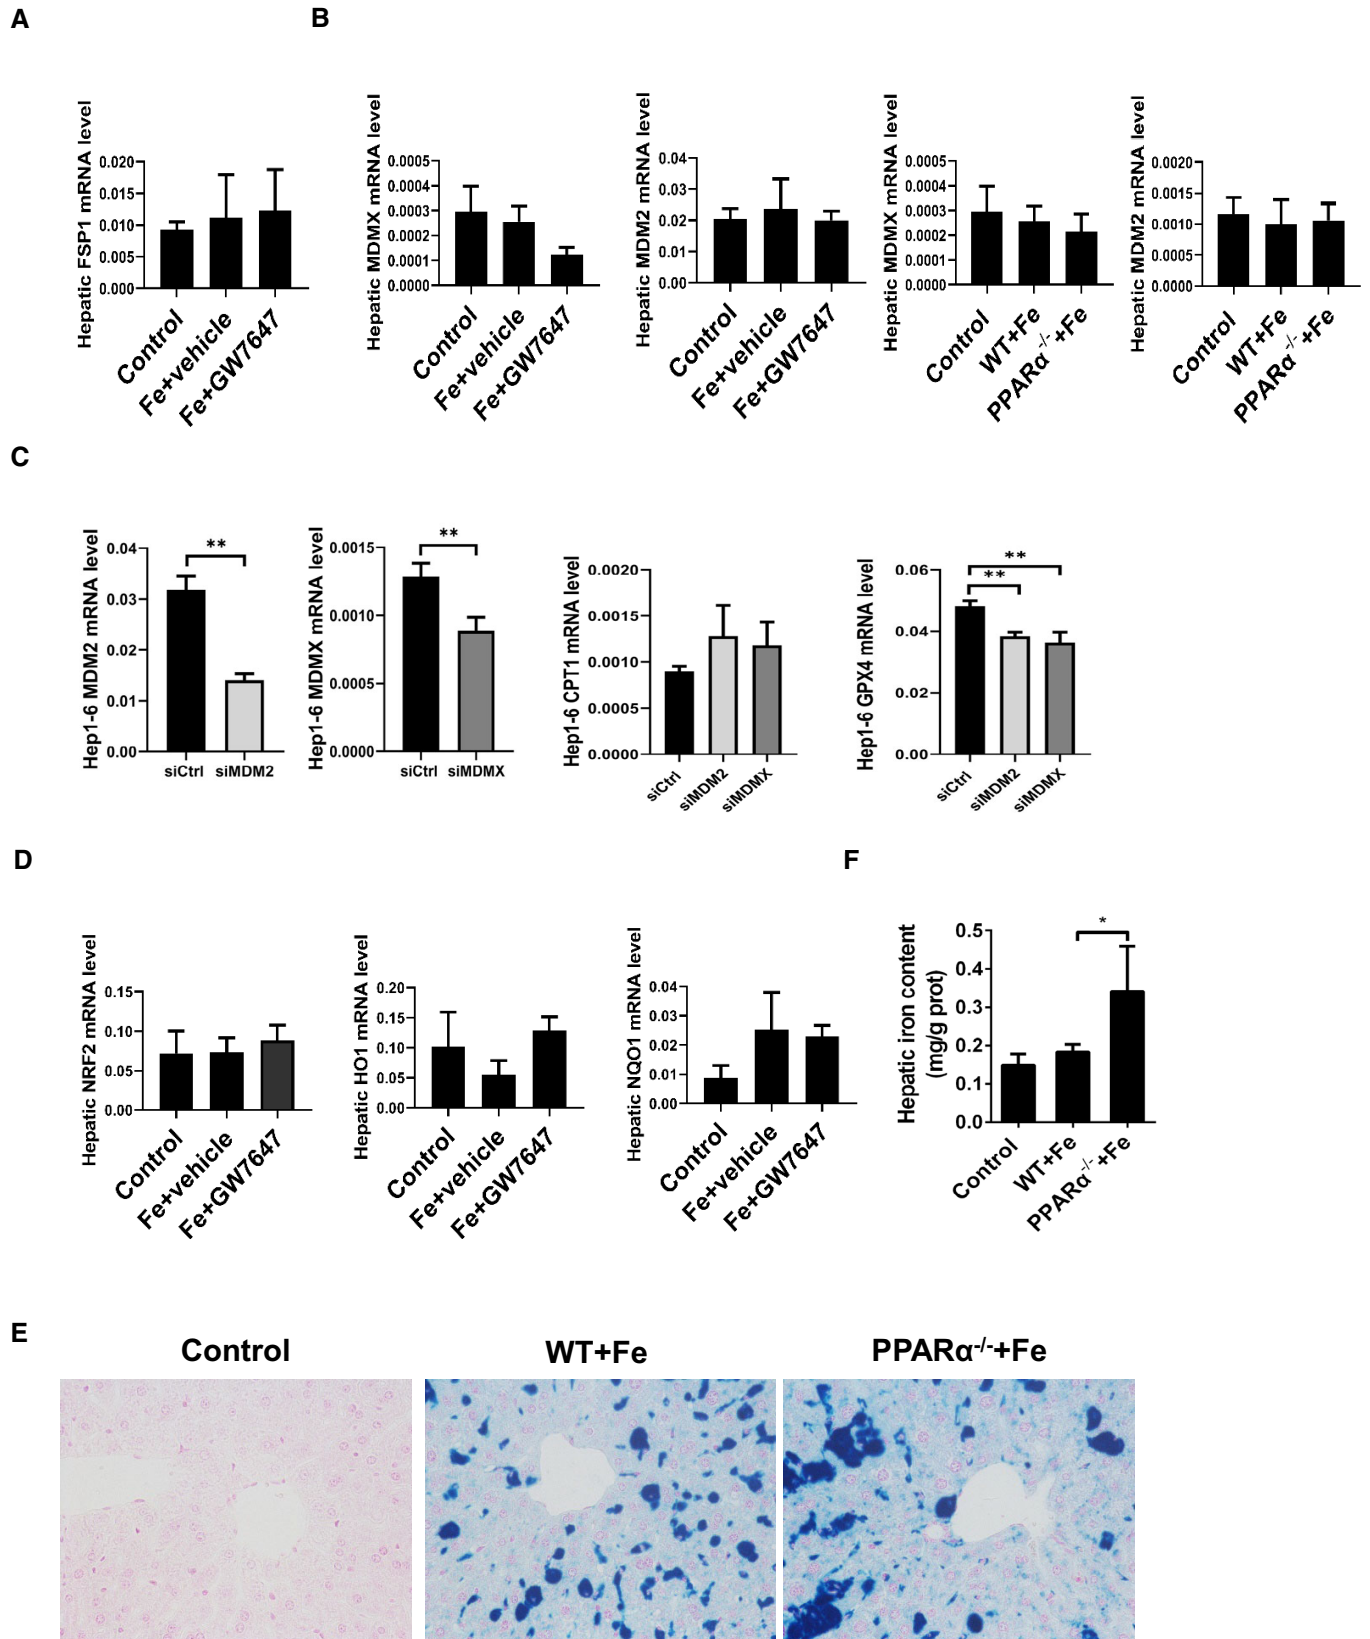

Figure EV2.

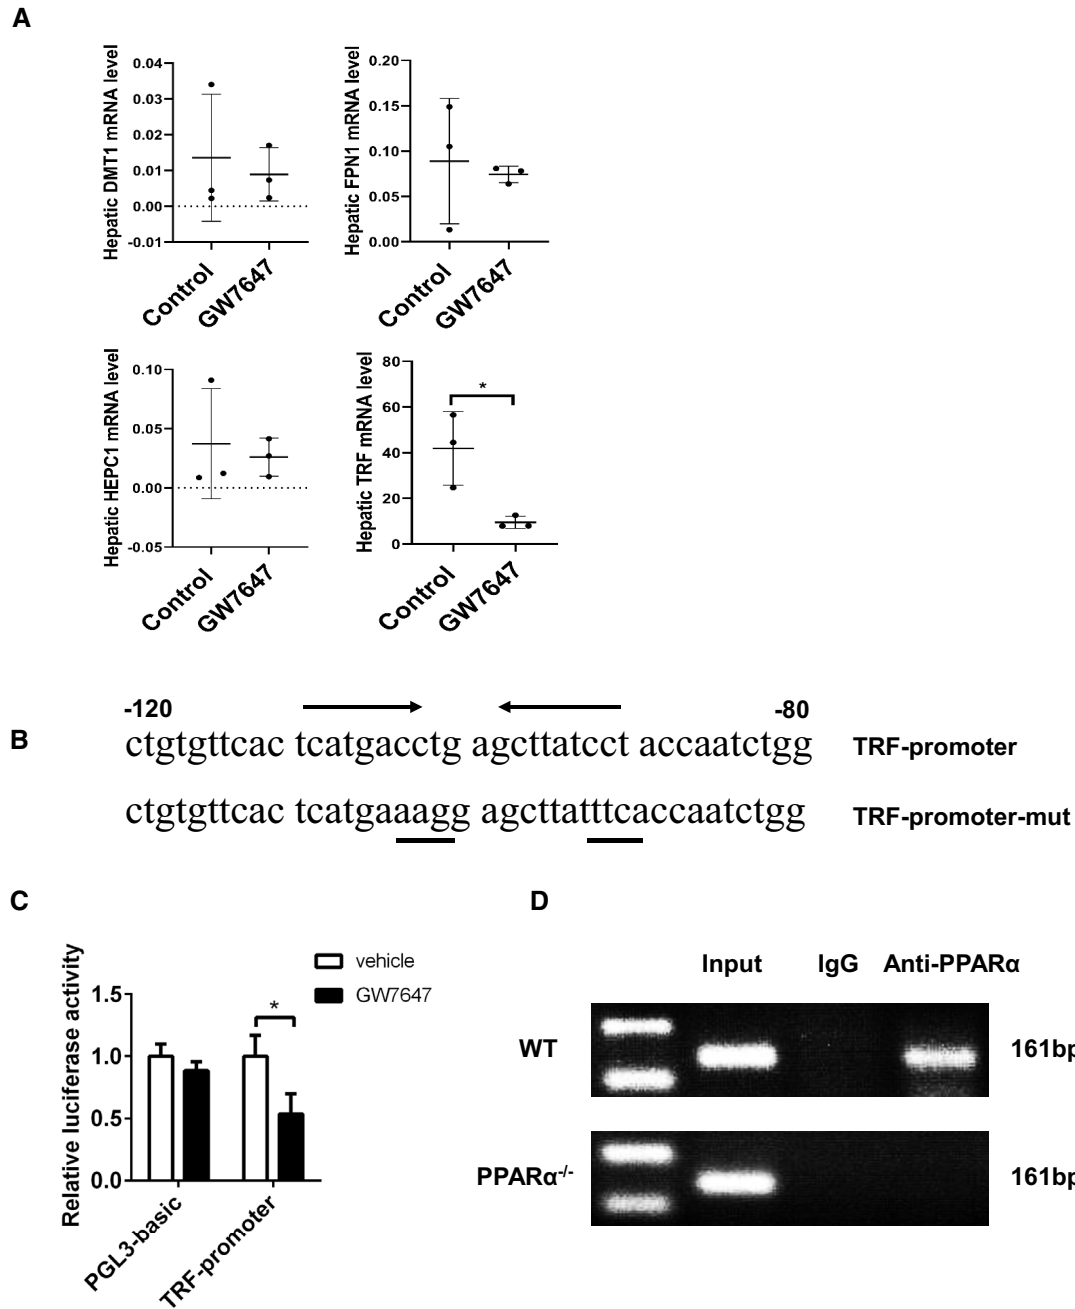

**Figure EV3. PPAR $\alpha$  regulates TRF transcriptional activity by binding to a PPRE in promoter of TRF.**

A Hepatic DMT1, FPN1, HEPC1 and TRF mRNA levels were measured in the indicated mice;  $n = 3$  mice/group.

B Schematic of the TRF-promoter-PPRE.

C A 2,000-base pair fragment of the promoter of mouse TRF was inserted into the pGL3 promoter vector to generate the pGL3 promoter constructs. These reporter constructs were transfected into Hep1-6 cells. The indicated PPAR $\alpha$  ligands were added to cell cultures 24 h before the reporter gene assay. Data were calculated as the fold induction with respect to the empty vector (pGL3 promoter luciferase vector).  $n = 3$  biological replicates.

D Chromatin immunoprecipitation assays were performed on soluble formaldehyde-crosslinked chromatin isolated from untreated and GW7647-treated WT or PPAR $\alpha$ <sup>-/-</sup> livers with polyclonal anti-PPAR $\alpha$  antibodies (anti-PPAR $\alpha$ ) or control IgG. The final DNA extraction was polymerase chain reaction-amplified with a primer pair that covered the sequence in the promoter of Gpx4.

Data information: mRNA levels were normalized to 36B4 and are expressed relative to the mean value of the WT group; Data are presented as means  $\pm$  SD. \* $P < 0.05$ , determined by ANOVA.

**Figure EV4. PPAR $\alpha$  deletion increases ferroptosis caused by iron overload.**

- A Hepatic iron content was measured in 8-week-old WT, PPAR $\alpha$ <sup>-/-</sup> mice that received intraperitoneal injections of dextransulfate or saline.
- B Serum ALT and AST levels were measured in 8-week-old WT, PPAR $\alpha$ <sup>-/-</sup> mice that received intraperitoneal injections of dextransulfate or saline.
- C Liver sections were obtained from the indicated mice and stained with H&E. All scale bars are 50  $\mu$ m. *n* = 3 biological replicates.
- D Hepatic MDA content was measured in 8-week-old WT, PPAR $\alpha$ <sup>-/-</sup> mice that received intraperitoneal injections of dextransulfate or saline.
- E Measurement of intracellular ROS levels by fluorescent probe DCFH-DA, and the fluorescence intensity of ROS was calculated. All scale bars are 20  $\mu$ m. *n* = 3 biological replicates.
- F Hepatic Gpx4 mRNA levels were measured in the indicated mice.
- G Hepatic Gpx4 mRNA levels were measured in the mice that were fed a HID with or without Gpx4-AAV treatment.

Data information: In (A–G), *n* = 3–5 mice/group. mRNA levels were normalized to 36B4 and are expressed relative to the mean value of the WT group; Data are presented as means  $\pm$  SD. \**P* < 0.05, \*\**P* < 0.01, determined by ANOVA.

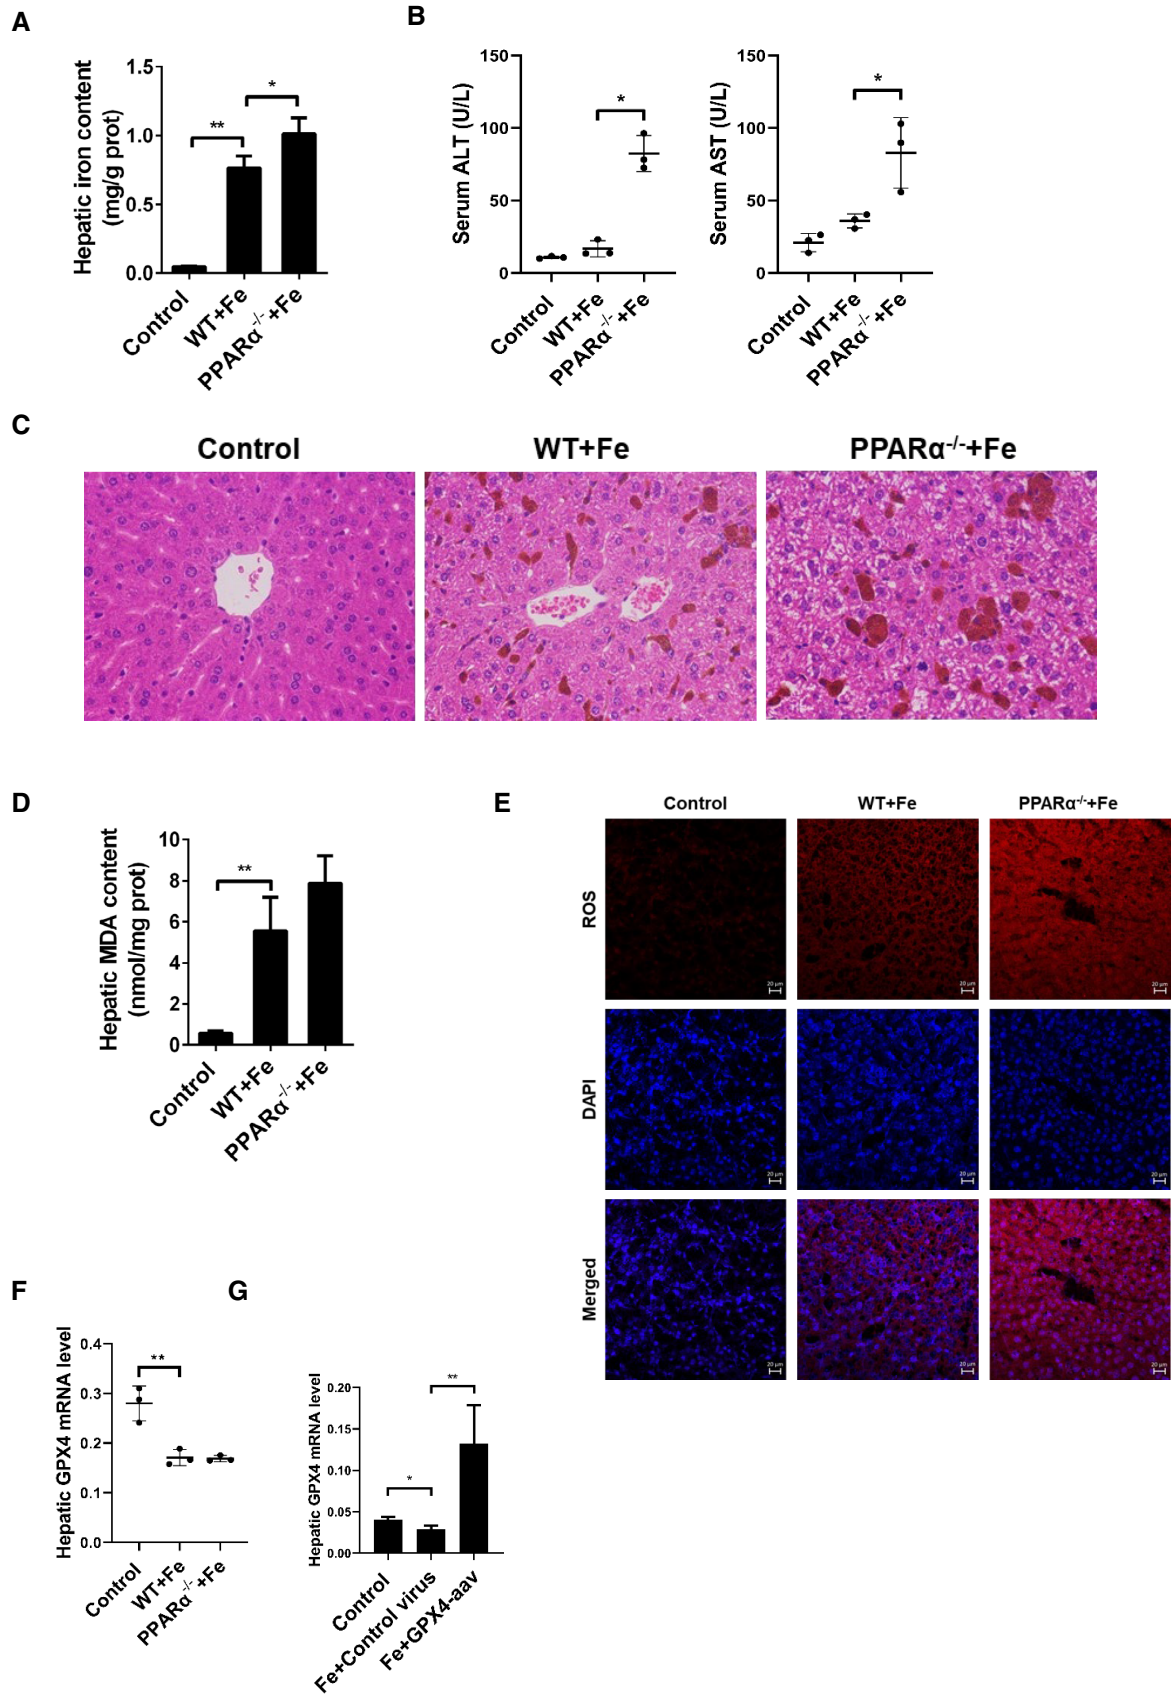

Figure EV4.
